# Supplementary material
Source: PubMed Central journal article supplement (PMC6934999)
Supplement: ASN.2019070646SupplementaryData.pdf [file ASN.2019070646SupplementaryData.pdf]

**Supplementary Material:**

**Economic evaluation of extending Medicare immunosuppressive drug coverage for kidney transplant recipients in the current era**

**Table of Contents:**

Supplemental Figure 1.....2  
Supplemental Figure 2.....3  
Supplemental Figure 3.....4  
Supplemental Figure 4.....5  
Supplemental Appendix 1.....6

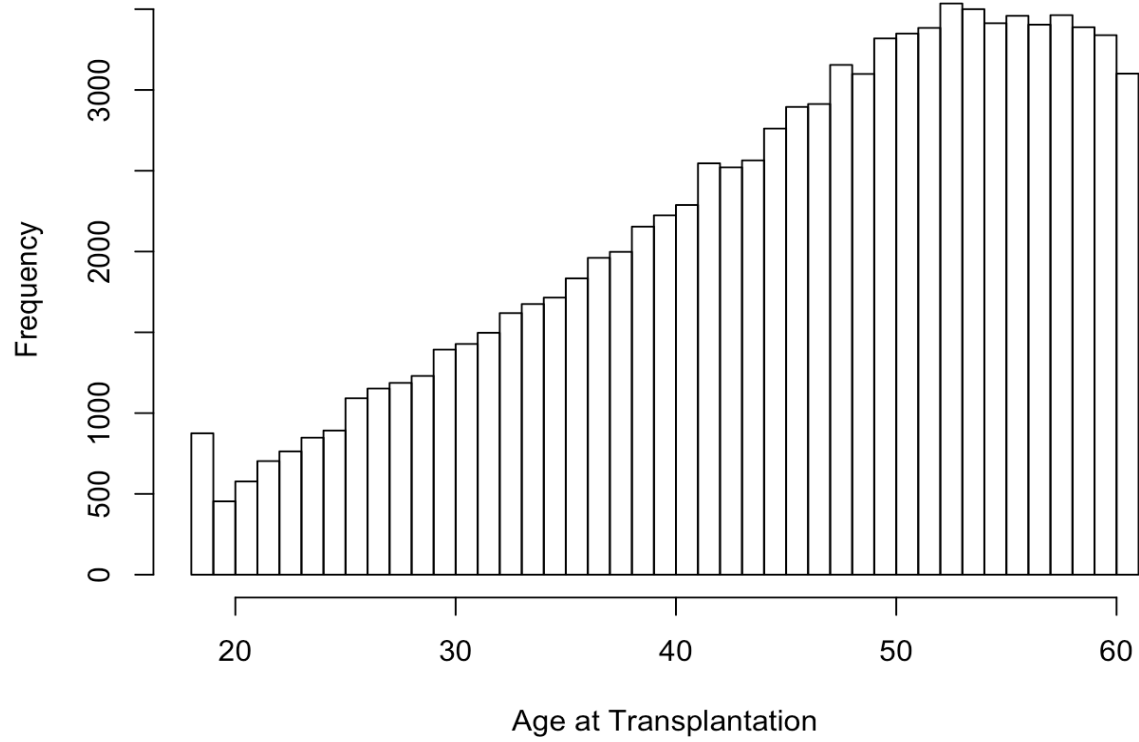

Supplemental Figure 1: Age distribution of Medicare insured patients included in the survival analysis.

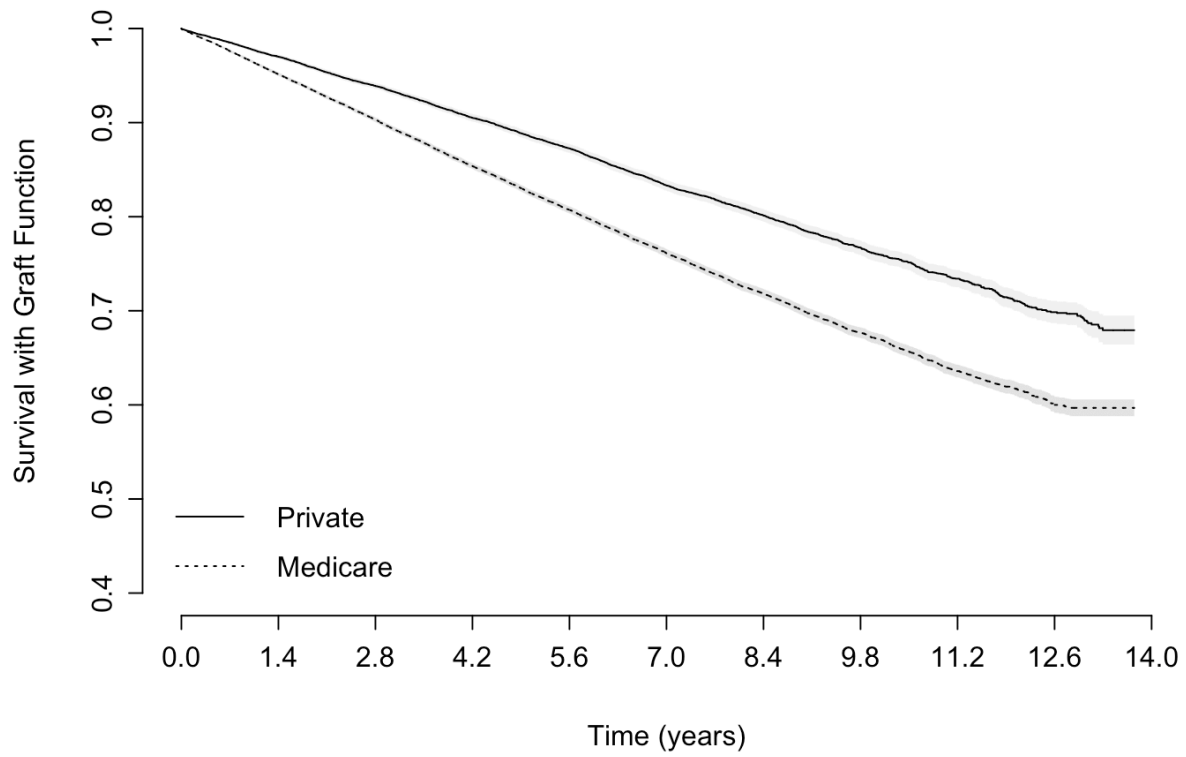

Supplementary Figure 2: Kaplan-Meier curves of all-cause transplant failure stratified by insurance status. Privately insured patients are represented by the solid line, while Medicare insured patients are represented by the dashed line.

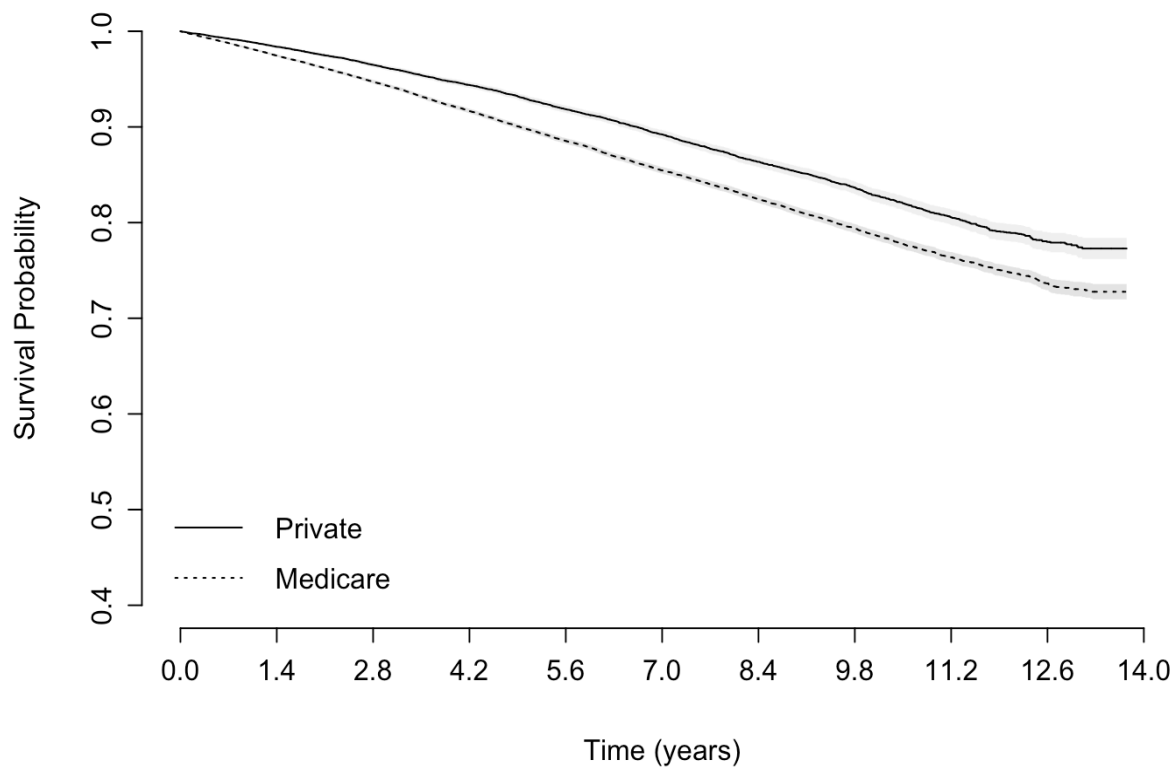

Supplementary Figure 3: Kaplan-Meier curves of all-cause mortality stratified by insurance status. Privately insured patients are represented by the solid line, while Medicare insured patients are represented by the dashed line.

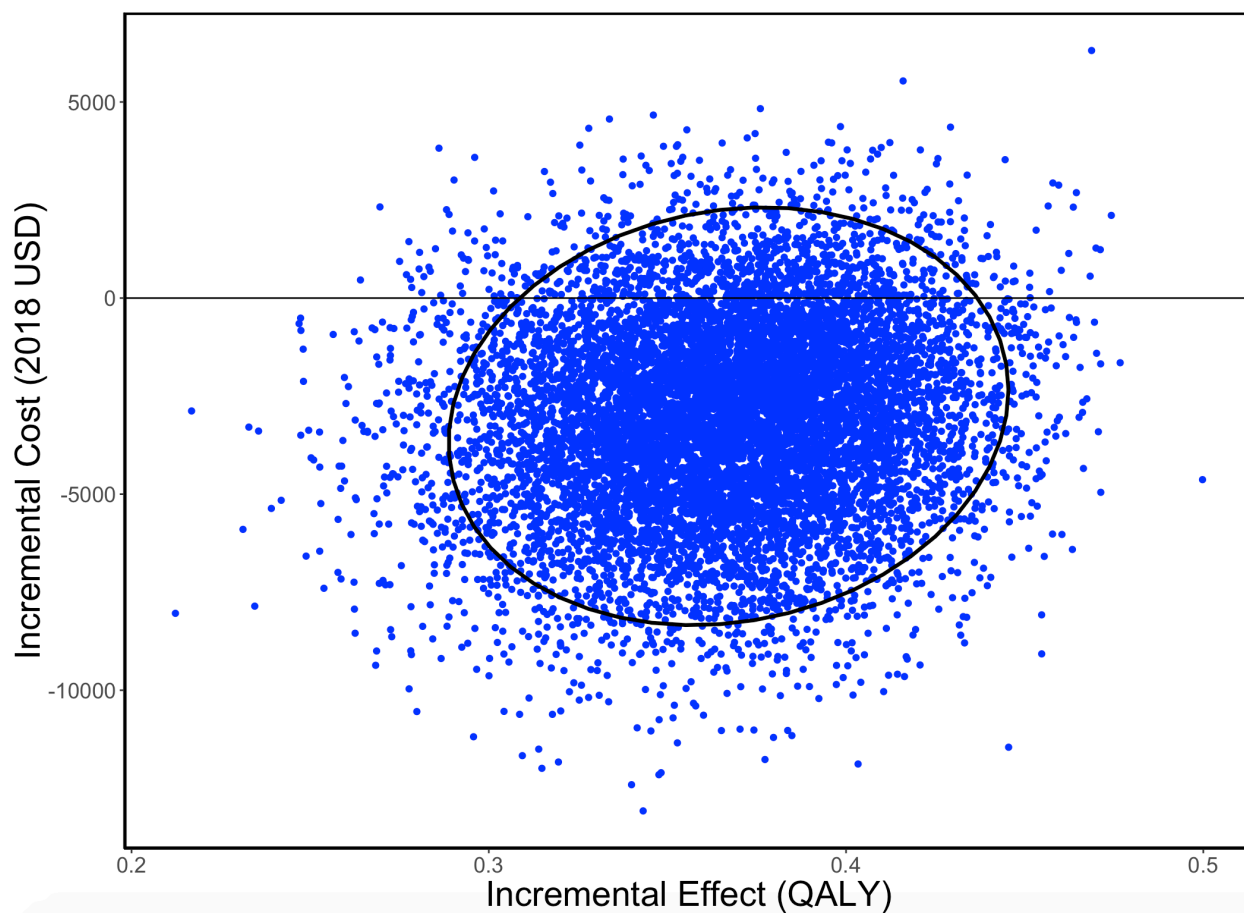

Supplementary Figure 4: Plot of results of 10,000 probabilistic analyses iterations. Each point on the graph represents the results of one iteration of the probabilistic analysis. The black circle represents the 95% confidence ellipse.

**Supplementary Appendix 1: Calculation to determine the mean annual cost per patient per year of dialysis assuming 80% of individuals with ESRD are treated with home therapies or transplantation.**

All inputs obtained from the 2016 USRDS Data report.  
All costs adjusted to 2018 USD using the consumer price index.

Inputs:

| <b>Calculation Inputs</b>                                       |          |
|-----------------------------------------------------------------|----------|
| Current percentage of prevalent ESRD patients with a transplant | 29.6%    |
| Cost per patient per year for hemodialysis                      | \$95,519 |
| Cost per patient per year for peritoneal dialysis               | \$79,985 |

Given that 29.6% of patients already have a transplant, the percentage of individuals treated with a home therapy would have to increase to 50.4% to achieve the final goal of 80% of individuals treated with a home therapy or transplantation, assuming no increase in transplantation.

Of the patients not treated with a transplant (i.e. those dependent on dialysis), this would equate to 71.6% ( $50.4/(1-0.296)$ ) of patients being treated peritoneal dialysis or other home hemodialysis.

Assuming the cost of peritoneal dialysis and home hemodialysis is similar, the mean annual cost per patient per year for dialysis therapy overall would then be:

$$0.716 * \$79985 + (1-0.716) * \$95519 = \$84399$$
